# Supplementary material for: Small-Scale Randomized Controlled Trial to Explore the Impact of β-Hydroxy-β-Methylbutyrate Plus Vitamin D3 on Skeletal Muscle Health in Middle Aged Women
Source: Nutrients. 2022 Nov 4;14(21):4674. doi: 10.3390/nu14214674 (PMC9658601; doi:10.3390/nu14214674)
Supplement: Supplementary file 1 [file nutrients-14-04674-s001.zip › Supplemental Table S1.xlsx]

## Sheet: Supplemental Table 1
	Supplmental Table S1. Blood Chemistry, Lipids and Urine Analysis		Sedentary								Resistance Exercise Training
			Placebo				HMB+D				Placebo				HMB+D
			PRE		POST		PRE		POST		PRE		POST		PRE		POST
	Variable	Unit	Avg	SD	Avg	SD	Avg	SD	Avg	SD	Avg	SD	Avg	SD	Avg	SD	Avg	SD
	Glucose	mg/dL	93	7	93.4167	7.22946	89.3	6.81583	88.0909	8.37203	89.5556	10.1009	94.4	8.50098	91.7778	7.4461	90.3	6.49872
	Uric Acid	mg/dL	4.425	1.21739	4.26667	1.03602	4.30909	1.10585	4.32727	1.01793	4.11111	0.422624	4.28	0.703641	4.3	0.93675	4.49	1.20319
	BUN	mg/dL	15.5	4.21038	15.5833	3.75278	11.7273	3.03615	12.8182	4.0204	13.8889	5.1099	13.9	4.55705	12.4444	3.84419	12.8	3.61478
	Creatinine	mg/dL	0.795	0.0940503	0.804167	0.100856	0.738182	0.14952	0.778182	0.108057	0.767778	0.0849673	0.77	0.160416	0.743333	0.0956556	0.761	0.115706
	eGFR	mL/min/1.73	86.9167	11.6733	84.75	12.5055	91.7273	14.6225	88.5	13.7376	88	8.67468	88.6	14.0095	94.4444	14.9592	91.3333	14.5774
	BUN/Creatinine Ratio		19.5833	5.3165	19.5	4.52267	16.1818	4.62208	16.6364	4.73862	18.4444	6.42478	18.7	6.51579	17.1111	6.05071	17	4.96655
	Sodium	mmol/L	141.25	1.28806	140.583	2.84312	142	2.14476	141.545	1.21356	141.333	1.73205	140	1.82574	141.222	1.20185	141.4	1.3499
	Potassium	mmol/L	4.27273	0.27961	4.25	0.339786	4.15	0.279881	4.24545	0.469816	4.62222	0.624055	4.46	0.632807	4.25556	0.304594	4.3	0.312694
	Chloride	mmol/L	102.917	3.05877	102.083	1.97523	104.273	2.4532	102.818	1.88776	103.222	2.48886	102.4	2.41293	101.778	3.49205	102.3	3.88873
	Carbon Dioxide, Total	mmol/L	23.9167	2.99874	23.5833	2.23437	23.8182	1.88776	23.9091	1.97254	22.2222	2.72845	23.1	1.91195	24.7778	2.94863	24.2	3.08401
	Calcium	mg/dL	9.19167	0.296827	9.16667	0.257023	9.08182	0.365563	9.17273	0.4101	9.24444	0.441902	9.42	0.361478	9.04444	0.412647	9.21	0.617252
	Phosphorus	mg/dL	3.85455	0.47194	3.825	0.453522	3.87	0.383116	3.94545	0.307778	3.9	0.526783	3.6	0.503322	3.51111	0.293447	3.74	0.445222
	Protein, Total	g/dL	6.725	0.346738	6.66667	0.267423	6.63636	0.550041	6.66364	0.369521	6.88889	0.372305	6.88	0.367575	6.65556	0.441902	6.79	0.540473
	Albumin	g/dL	4.38333	0.164225	4.34167	0.172986	4.25455	0.211488	4.3	0.240832	4.31111	0.266667	4.33	0.149443	4.22222	0.227913	4.36	0.320416
	Globulin, Total	g/dL	2.34167	0.281096	2.325	0.200567	2.35455	0.527946	2.36364	0.341388	2.54444	0.364387	2.55	0.263523	2.43333	0.308221	2.43	0.298329
	A/G Ratio		1.9	0.244949	1.89167	0.192865	1.86364	0.358532	1.85455	0.323616	1.7	0.33541	1.73	0.176698	1.75556	0.224227	1.8	0.194365
	Bilirubin, Total	mg/dL	0.42	0.113529	0.372727	0.0904534	0.42	0.139841	0.4	0.141421	0.4625	0.0916125	0.566667	0.273861	0.322222	0.0833333	0.325	0.10351
	Alkaline Phosphatase	IU/L	75.75	19.6243	73.0833	19.8561	75.5455	17.259	78.9091	27.4206	97.5556	46.9258	91.9	32.726	69	16.3783	71.9	20.0746
	Creatine Kinase, Total	U/L	234.583	414.824	89.4167	36.8892	92.7273	53.6005	101.818	85.3426	157.667	174.088	237.8	316.737	94.3333	39.2619	133.9	97.8587
	LDH	IU/L	184.167	37.5859	177.917	25.2531	173.182	27.8884	177.273	30.9745	178.444	26.8799	189	47.7331	181.778	33.1126	183.7	40.5053
	AST (SGOT)	IU/L	23.1667	7.75574	21.1667	3.90415	20.3636	6.65241	21.7273	5.44226	23.6667	12.5399	22.6	9.25203	19	5.47723	19.2	7.87119
	ALT (SPGT)	IU/L	18.0833	6.24439	18.3333	5.26279	17.1818	8.71571	18.3636	8.41751	20.3333	14.3788	18.7	8.66731	16.4444	2.87711	14.9	5.91514
	GGT	IU/L	17.0833	7.65694	17.4167	8.98947	16.6364	15.5581	19.9091	25.7622	37.8889	69.8077	31.5	55.3198	13	6.81909	14.3	7.70353
	Iron	ug/dL	78.75	37.3025	69.8333	22.7669	84.8182	23.8613	83.5455	29.2656	71.2222	37.5093	85.8	41.7474	87.4444	15.5251	79.4	40.566
	Cholesterol, Total	mg/dL	215.083	37.5632	223	47.656	206.727	20.4014	229.091	40.9962	187.889	29.2337	196.9	31.2533	197.889	28.2376	199.5	35.4753
	Triglycerides	mg/dL	102.917	76.8605	111.083	63.3381	112.636	71.5546	125.636	114.763	92	30.899	94	31.6439	109.667	40.2399	111.7	48.1273
	HDL Cholesterol	mg/dL	67.3333	18.0219	70.5	16.4786	69.6364	17.6197	74.5455	20.6076	67	14.4568	67.6	14.1594	66.8889	22.5413	65.5	21.5058
	VLDL Cholesterol Cal	mg/dL	20.5	15.2643	21.8333	12.8405	22	14.4568	24.1818	22.2343	18.3333	6.16441	18	5.83095	21.4444	7.92324	21.2	8.02496
	LDL Cholesterol Calc	mg/dL	127.25	38.6432	130.667	47.586	115.091	23.4966	130.364	33.3595	102.556	21.0957	111.3	23.0364	109.556	22.9625	112.8	26.4777
	LDL/HDL Ratio	ratio	2.10833	1.01664	2.10833	1.36745	1.84545	0.816534	1.95455	0.922349	1.58889	0.395109	1.72	0.511642	1.81111	0.74405	1.89	0.721803
	WBC	x10e3/uL	5.175	0.911667	5.63333	1.26587	5.33636	1.19605	5.75	1.81368	5.25556	1.26502	5.43333	1.46458	5.28889	1.11405	5.42	1.30877
	RBC	x10e6/uL	4.43833	0.305103	4.37083	0.4096	4.35818	0.392245	4.365	0.302664	4.37667	0.317057	4.37778	0.330748	4.4	0.233773	4.441	0.366165
	Hemoglobin	g/dL	13.1167	0.784895	13.0333	1.10316	13.1182	1.20401	13.27	1.0478	13.0444	1.18965	13.2111	1.41549	13	0.815475	13.09	1.23778
	Hematocrit	%	39.3167	1.8379	38.8667	2.93082	39.0818	3.69535	39.21	2.67476	39.2111	3.23398	39.5778	3.6362	38.6111	2.19684	39.63	3.01922
	MCV	fL	88.6667	2.70801	89	3.64318	89.6364	3.93123	89.9	3.95671	89.5556	5.57026	90.5556	4.69338	87.7778	4.14662	89.3	3.49762
	MCH	pg	29.5917	1.19959	29.875	1.32262	30.1091	1.36048	30.41	1.46094	29.8444	2.33833	30.1667	2.14767	29.5667	1.38474	29.49	1.51617
	MCHC	g/dL	33.35	0.817424	33.525	0.920598	33.5818	0.80227	33.82	0.612463	33.2444	0.870504	33.3667	1.13688	33.6444	0.864741	33	1.06249
	RDW	%	13.4083	0.741569	13.4833	0.780249	12.9727	0.965496	13.01	1.00714	13.5556	1.11592	13.3667	1.00747	13.0667	0.957862	13.06	0.995769
	Platelets	x10e3/uL	269.833	49.9014	278.417	72.9975	277.6	54.2816	268.9	44.9999	263.556	52.9578	262.778	70.0549	304.667	59.2516	317	47.8772
	Neutrophils	%	53.1667	9.64679	52.5	11.1314	55.8182	8.99798	51.8	14.2657	51.3333	7.05337	52.6667	9.72111	48.5556	8.56024	49.5	11.5686
	Lymphs	%	32.4167	8.4257	33.6667	9.63265	32.7273	7.61697	36.6	12.6509	36.2222	5.91138	34	7.17635	37.5556	4.90181	37.7	8.17924
	Monocytes	%	8.25	2.13733	8.5	1.93061	8	1.67332	8	1.1547	8.55556	2.35112	9	3.08221	9.55556	3.2059	8.4	3.33999
	Eos	%	4.83333	4.70654	4	3.43776	2.81818	1.4013	3	2.16025	3.22222	1.20185	3.55556	2.00693	3.55556	2.06828	3.5	1.77951
	Basos	%	1.25	0.753778	1	0.426401	0.545455	0.687552	0.6	0.516398	0.666667	0.5	0.777778	0.440959	0.777778	0.440959	0.7	0.483046
	Neutrophils (Absolute)	x10e3/uL	2.775	0.756938	2.95833	0.840409	3.03636	0.971877	3.13	1.62279	2.68889	0.699007	2.86667	0.975961	2.61111	0.754063	2.68	0.916273
	Lymphs (Absolute)	x10e3/uL	1.69167	0.481396	1.91667	0.679349	1.68182	0.256196	1.98	0.584618	1.92222	0.649573	1.82222	0.533333	1.96667	0.37081	2.03	0.569698
	Monocytes (Absolute)	x10e3/uL	0.416667	0.0937437	0.466667	0.107309	0.418182	0.116775	0.47	0.133749	0.466667	0.173205	0.5	0.187083	0.511111	0.202759	0.45	0.190029
	Eos (Absolute)	x10e3/uL	0.25	0.243086	0.225	0.176455	0.163636	0.0924416	0.16	0.0966092	0.177778	0.0833333	0.2	0.141421	0.188889	0.105409	0.2	0.11547
	Baso (Absolute)	x10e3/uL	0.0583333	0.0668558	0.0583333	0.0668558	0.0181818	0.040452	0.03	0.0483046	0.0222222	0.0440959	0.0555556	0.0527046	0.0333333	0.05	0.03	0.0483046
	Immature Granulocytes	%	0.0833333	0.288675	0.333333	0.492366	0.0909091	0.301511	0	0	0	0	0	0	0	0	0.2	0.632456
	Immature Grans (Abs)	x10e3/uL	0	0	0.0166667	0.0389249	0.00909091	0.0301511	0	0	0	0	0	0	0	0	0.01	0.0316228
	Urine Specific Gravity		1.01817	0.00675323	1.01691	0.00597419	1.01755	0.007448	1.01691	0.00486733	1.01667	0.00507445	1.01889	0.00478133	1.01556	0.00492725	1.01388	0.00559177
