# Supplementary figures and images for: Small-Scale Randomized Controlled Trial to Explore the Impact of β-Hydroxy-β-Methylbutyrate Plus Vitamin D3 on Skeletal Muscle Health in Middle Aged Women
Source: MDPI journal article supplement (doi:10.3390/nu14214674), 2022-11-04

Supplemental Figure S1. Study Flow Chart.

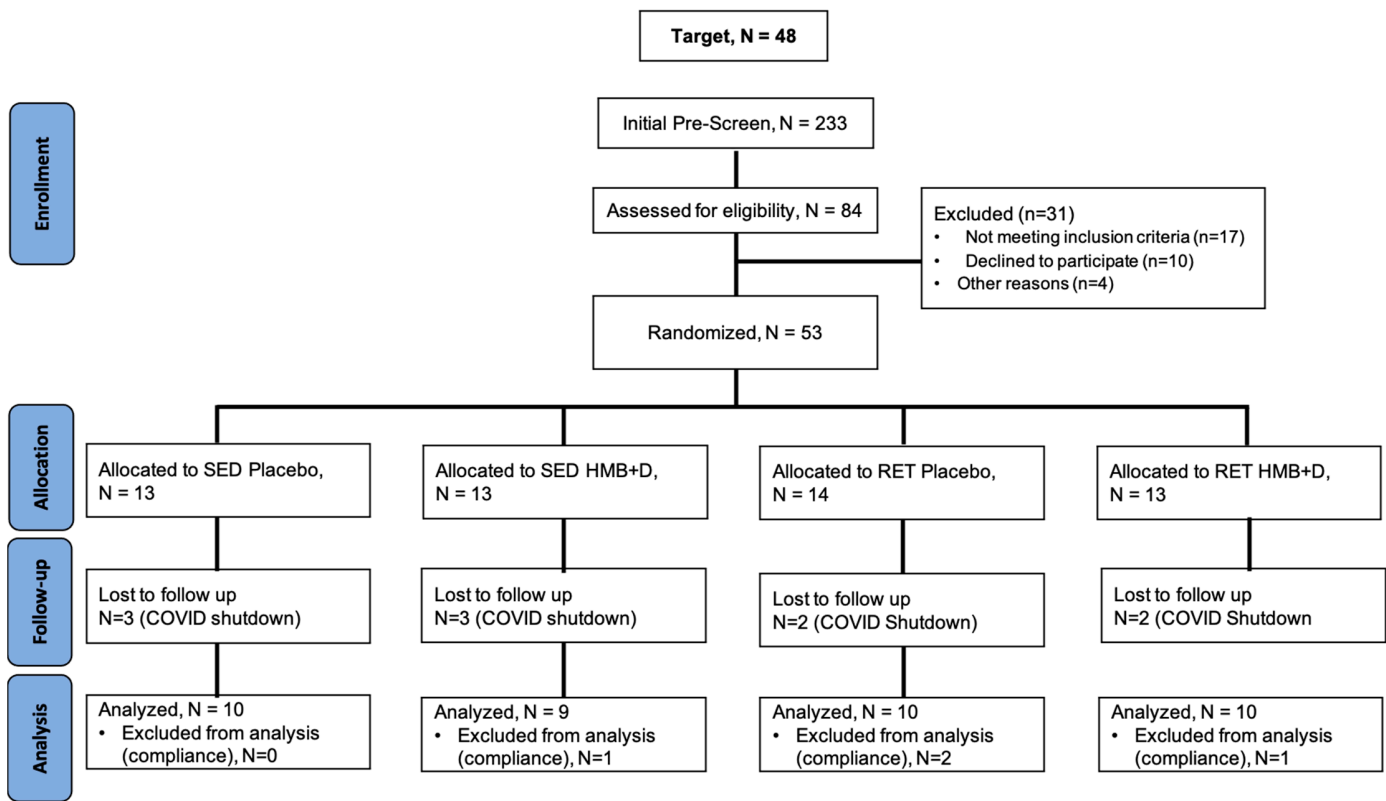

Supplement: s1 [file s1]
